# Supplementary material for: The NF-κB Transcription Factor c-Rel Modulates Group 2 Innate Lymphoid Cell Effector Functions and Drives Allergic Airway Inflammation
Source: PubMed Central journal article supplement (PMC8635195; doi:10.3389/fimmu.2021.664218), 2021-11-16

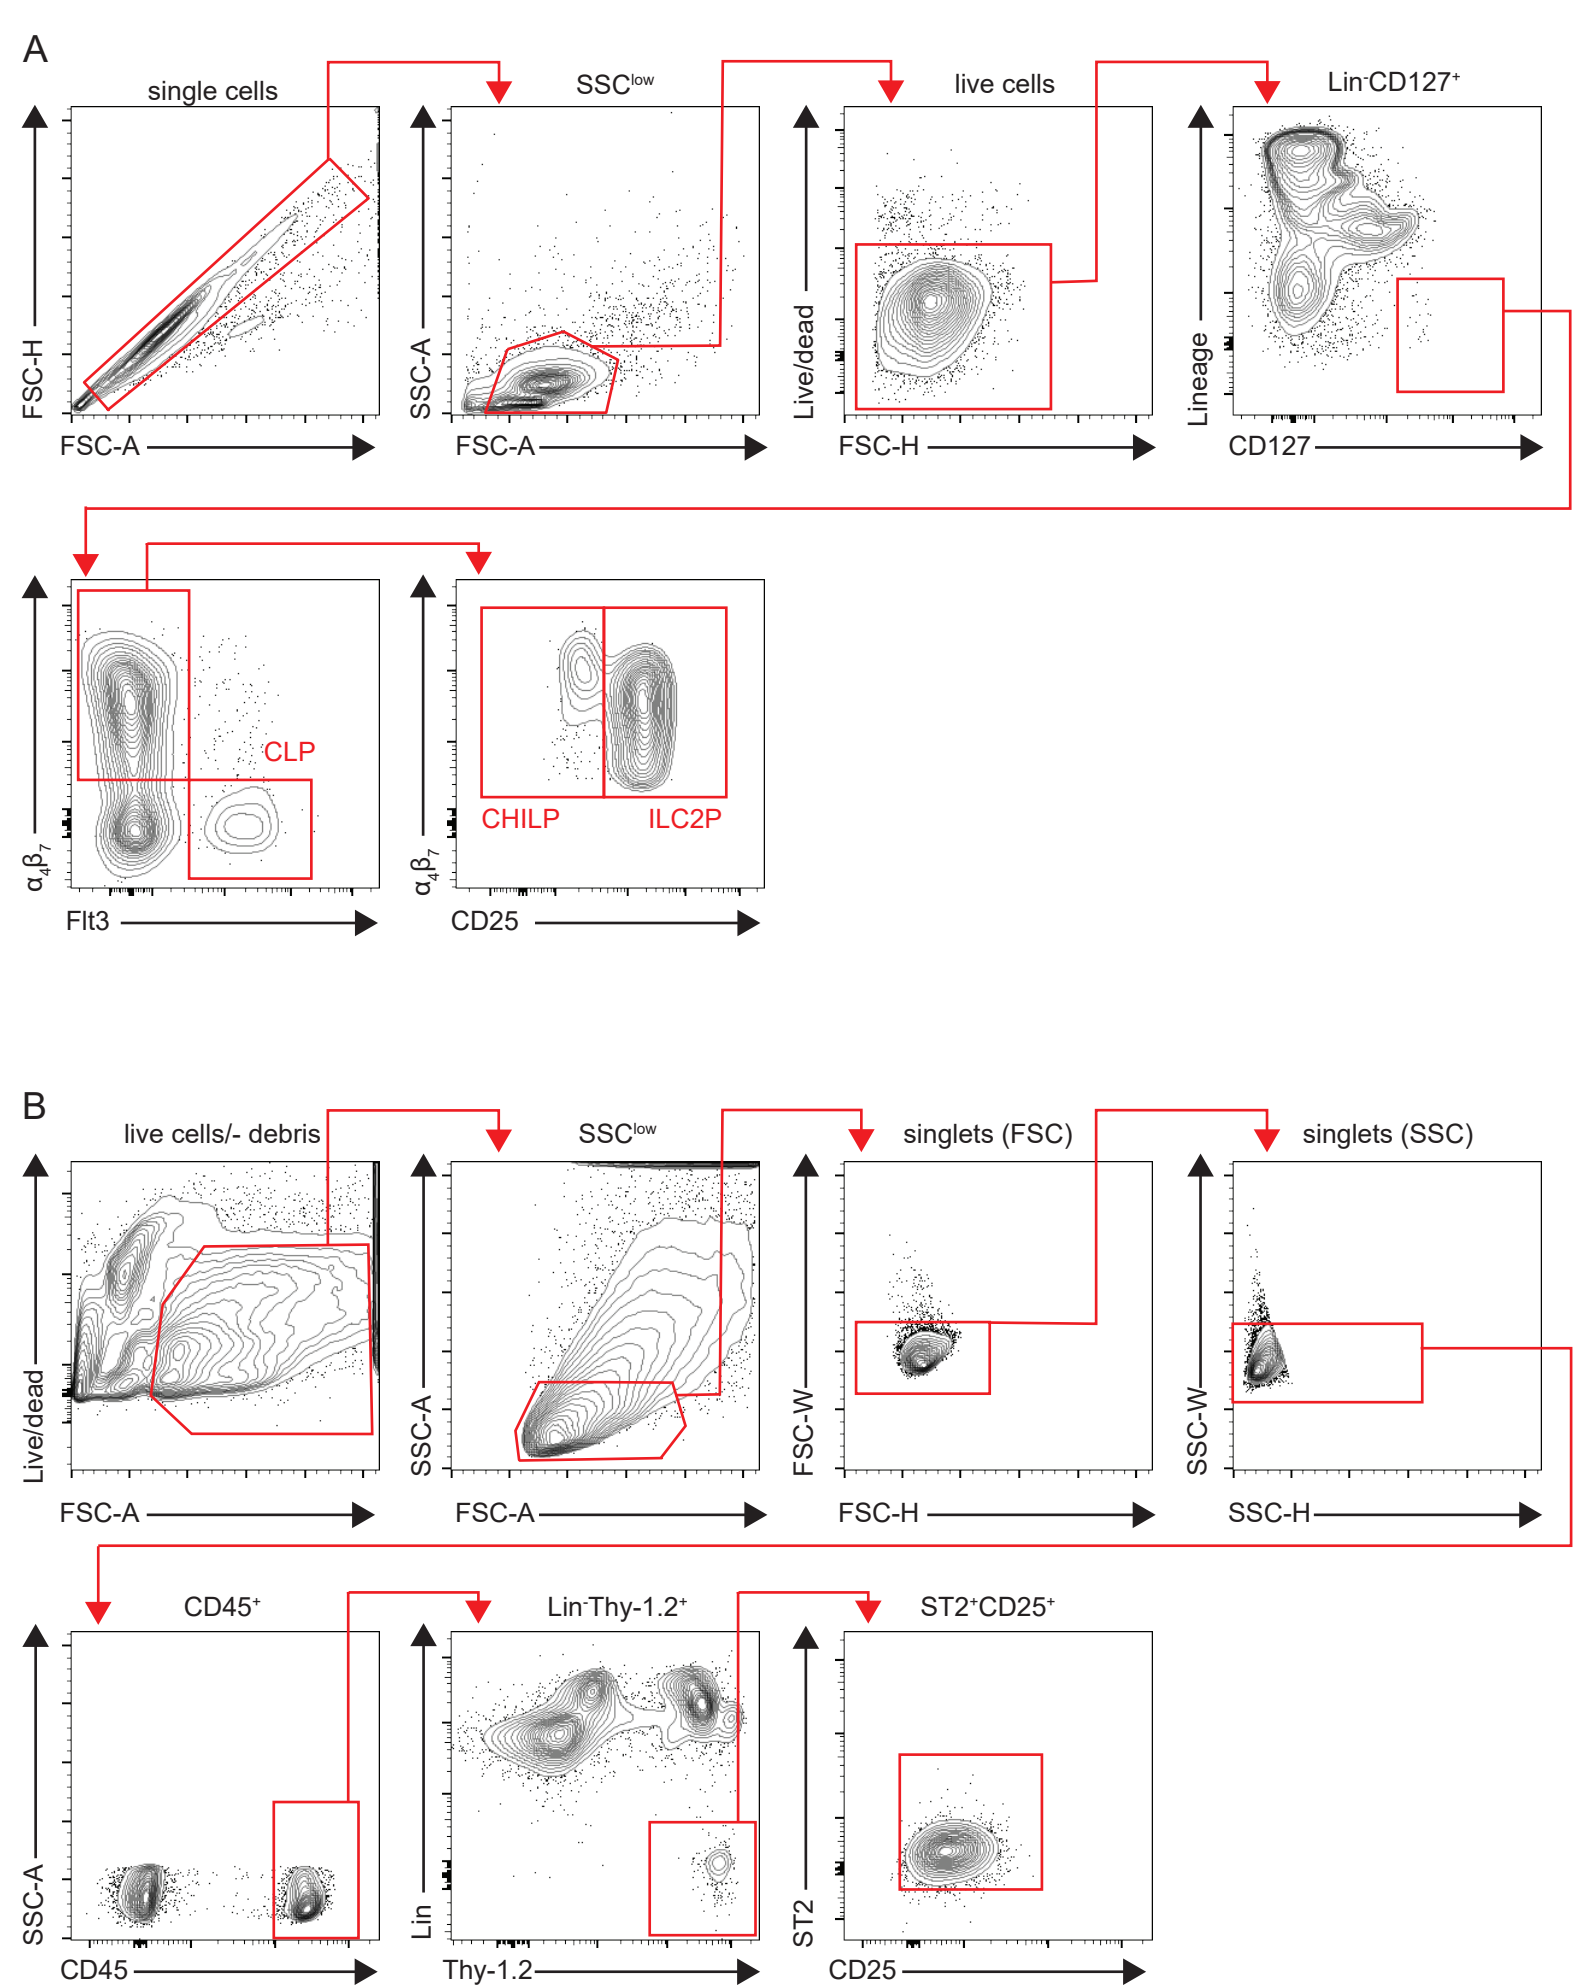

Supplement: Image_2.pdf [file Image_2.pdf]
